# Supplementary material for: The synthetic antihyperlipidemic drug potassium piperate selectively kills breast cancer cells through inhibiting G1-S-phase transition and inducing apoptosis
Source: PubMed Central journal article supplement (PMC5564562; doi:10.18632/oncotarget.16872), 2017-04-12
Supplement: oncotarget-08-47250-s001.pdf [file oncotarget-08-47250-s001.pdf]

## The synthetic antihyperlipidemic drug potassium piperate selectively kills breast cancer cells through inhibiting G1-S-phase transition and inducing apoptosis

### SUPPLEMENTARY MATERIALS

### SUPPLEMENTARY FIGURES AND TABLES

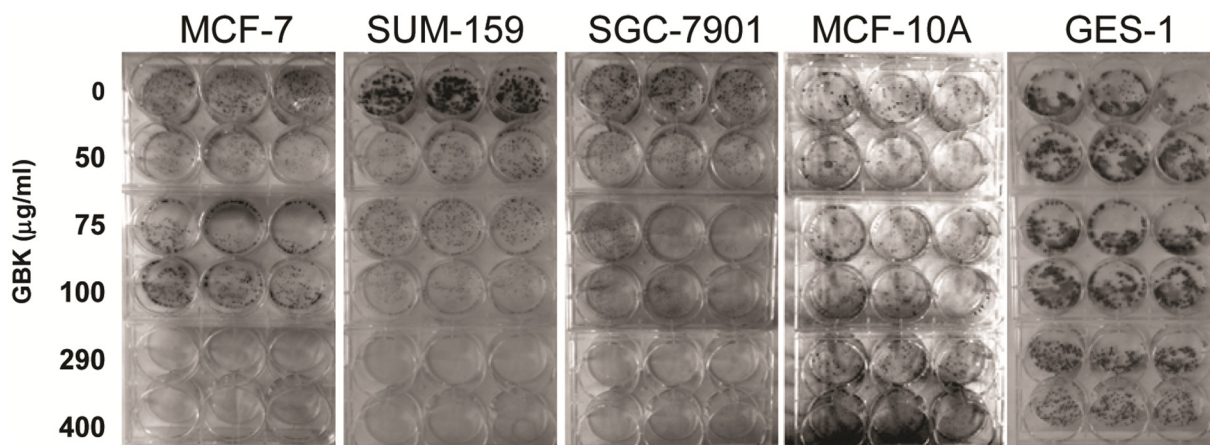

**Supplementary Figure 1: Selective killing of tumor cells by GBK in a dose-dependent manner.** Normal and tumor cells were treated with GBK at 0-400 µg/ml concentrations for 14 days, and live cells were stained by crystal violet. ddH<sub>2</sub>O was used as control solvent. GBK exhibited cytotoxicity only in tumor cells (MCF-7, SUM159 and SGC-7901) and not in normal human breast epithelial cells (MCF-10A) and human gastric mucosa cells (GES-1) at less than 290 µg/ml concentration. At higher concentration of GBK (>400 µg/ml) slight cytotoxicity was observed in normal human breast epithelial cells.

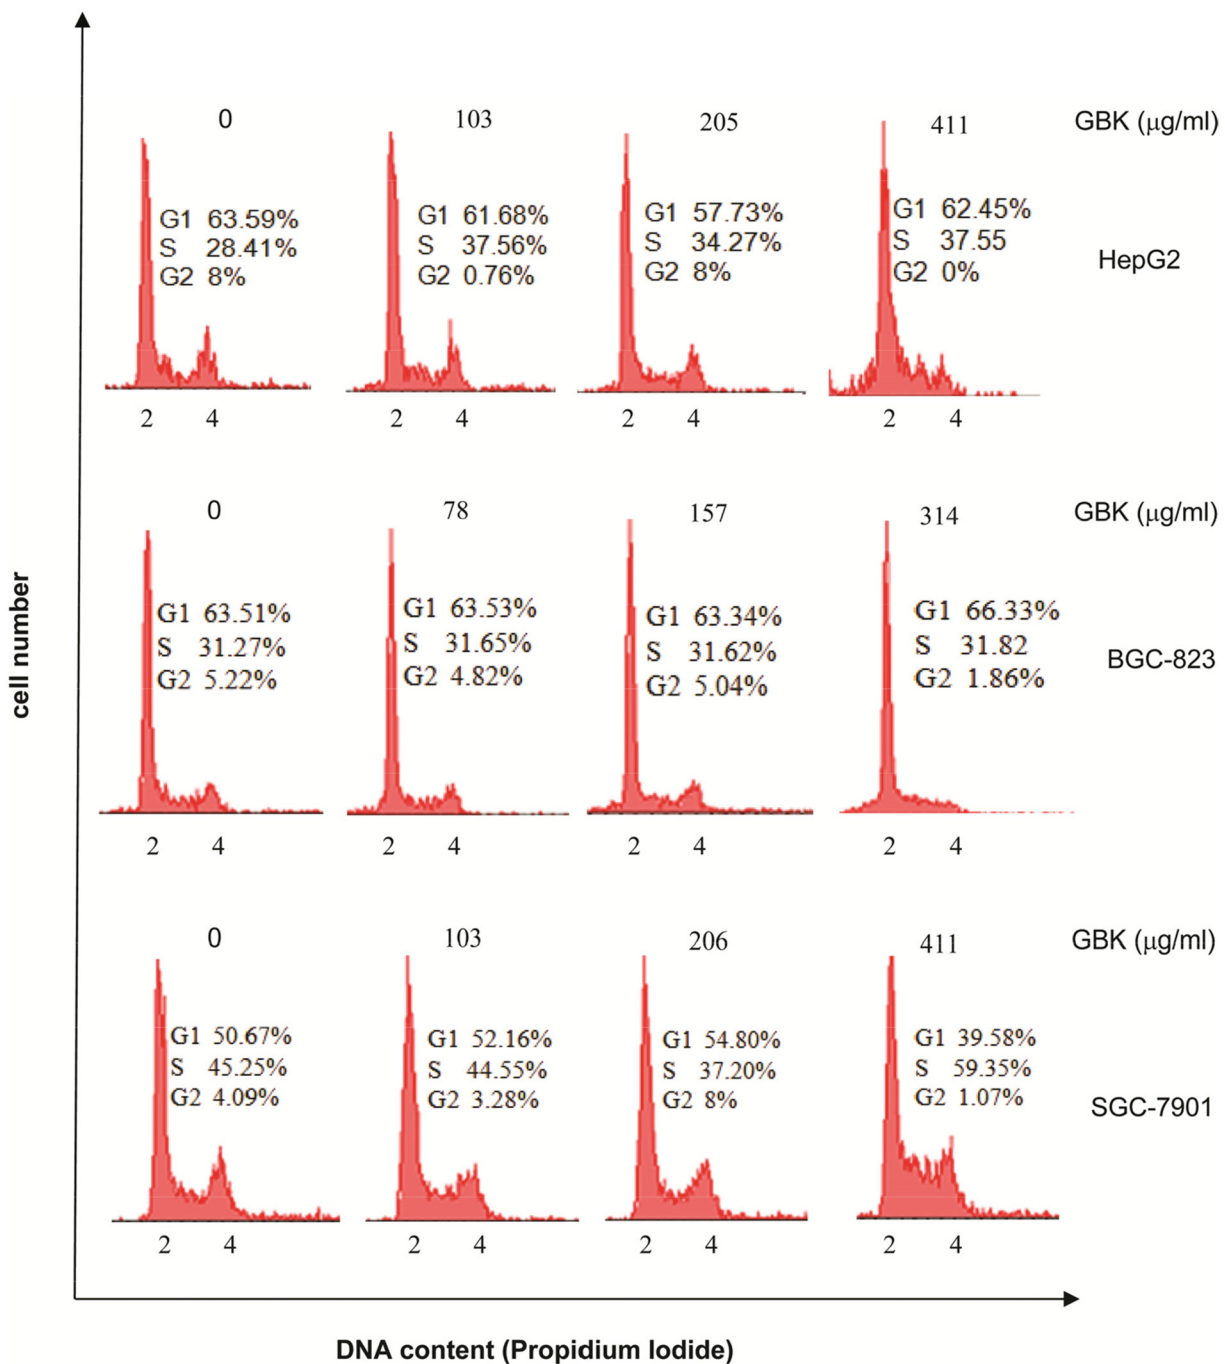

**Supplementary Figure 2: GBK induces G1/S arrest in breast cancer cell line MCF-7 *in vitro* but not in other cancer cell lines.** Three different cancer cell lines (HepG2, BGC-823 and SGC-7901) were treated with different concentrations of GBK for 48 h respectively according to their different  $IC_{50}$  values, and cell cycle distributions were analyzed by flow cytometry. ddH<sub>2</sub>O was used as control.

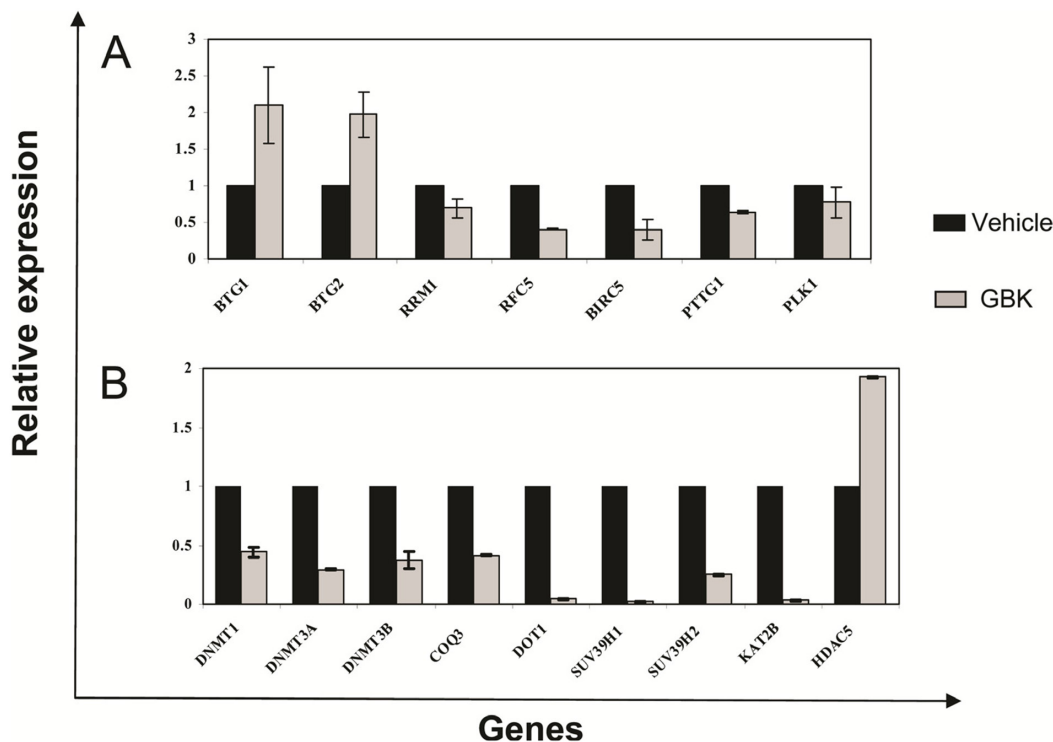

**Supplementary Figure 3: Differential expression of genes in MCF-7 cells treated with GBK.** Differential expression of genes in MCF-7 cells after treatment with GBK were analyzed by RT-qPCR. **(A)** Genes related to cancer progression were selected. BTG1/2 are members of a family of antiproliferative genes, RRMI is ribonucleotide reductase M1, RFC5 is the replication factor C which is required for DNA replication, BIRC5 is a member of the inhibitor of apoptosis (IAP) gene family, PTTG1 is pituitary tumor-transforming 1 which is highly expressed in various tumors, and PLK1 is Polo-like kinase 1 which is also highly expressed in various tumors. **(B)** Genes related to DNA methylation, histone methylation and acetylation were selected. DNMT1, DNMT3A, DNMT3B and COQ3 are DNA methyltransferase. DOT1, SUV39H1 and SUV39H2 are histone methyltransferase. KAT2B is K (lysine) acetyltransferase 2B and HDAC5 is histone deacetylase 5.

**Supplementary Table 1: IC<sub>50</sub> of human cancer cells and normal cells treated with GBK**

| Cell lines | Remark                            | IC <sub>50</sub> (µg/ml) |
|------------|-----------------------------------|--------------------------|
| MCF-7      | Human breast cancer cells         | 291.5                    |
| MDA-MB-231 | Human breast cancer cells         | 295                      |
| SUM-159    | Human breast cancer cells         | 250                      |
| HepG2      | Human liver cancer cells          | 205.4                    |
| A549       | Human lung cancer cells           | 191.5                    |
| SGC-7901   | Human gastric cancer cells        | 205.6                    |
| BGC-823    | Human gastric cancer cells        | 156.8                    |
| MCF-10A    | Human mammary epithelial cells    | —                        |
| HSF        | Human skin fibroblast cells       | —                        |
| GES-1      | Human gastric mucosa cells        | —                        |
| L132       | Human lung epithelial cells       | —                        |
| COS-7      | African green monkey kidney cells | —                        |

The results suggest that GBK has cytotoxicity on different human cancer cell lines, but not on normal human cells. The IC<sub>50</sub> of human breast cancer cells treated with GBK ranges from 250 µg/ml to 295 µg/ml.

**Supplementary Table 2: Differential expression of genes in MCF-7 cells treated with GBK**

See Supplementary File 1

**Supplementary Table 3: Differential expression of genes in SGC-7901 cells treated with GBK**

See Supplementary File 1

**Supplementary Table 4: Primers used in RT-qPCR to validate microarray data**

See Supplementary File 1

**Supplementary Table 5: Expression profiling of GBK-responsive gene transcripts involved in cell apoptosis selected from Affymetrix GeneChip® PrimeView™ Human Gene Expression Array**

| Gene ID       | Expression fold | Description                         | Gene symbol | Signaling pathway         |
|---------------|-----------------|-------------------------------------|-------------|---------------------------|
| 11717364_a_at | 0.4714          | BCL2-like 12                        | Bcl-2L12    | Apoptosis                 |
| 11754110_x_at | 0.4356          | baculoviral IAP repeat-containing 5 | BIRC5       | Apoptosis                 |
| 11737440_a_at | 2.2025          | BCL2 modifying factor               | BMF         | Apoptosis                 |
| 11759444_x_at | 1.1636          | BCL2-associated X protein           | BAX         | Apoptosis                 |
| 11731870_a_at | 1.1634          | NADPH oxidase activator 1           | NOXA        | Apoptosis                 |
| 11757047_x_at | 1.4219          | activating transcription factor 4   | ATF4        | Smooth muscle contraction |

GBK treatment and global transcription microarray analysis for MCF-7 cells were as described in methods and text. The relative expressions of genes involved either in the apoptotic or pro-survival responses were calculated by finding ratio of the values of GBK treatment group to that of vehicle treatment group. The expression fold < 0.5 indicates down-regulated expressions. The expression fold > 1 shows up-regulated expression. The gene ID indicates the Entry number of NCBI.
